# Supplementary material
Source: PubMed Central journal article supplement (PMC5833550)
Supplement: jama-319-241-s003.pdf [file jama-319-241-s003.pdf]

### Supplemental Online Content 3

Slaminen P, Helmiö M, Ovaska J, et al. Effect of laparoscopic sleeve gastrectomy vs laparoscopic Roux-en-Y gastric bypass on weight loss at 5 years among patients with morbid obesity: the SLEEVEPASS randomized clinical trial. *JAMA*. doi:10.1001/jama.2017.20313

eTable. Percent Total Weight Loss and Weight, Model-Based Means After Laparoscopic Sleeve Gastrectomy and Laparoscopic Roux-en-Y Gastric Bypass at Baseline, 6 months, and 1, 3, and 5 Years

This supplemental material has been provided by the authors to give readers additional information about their work.

**eTable.** Percent Total Weight Loss and Weight, Model-Based Means After Laparoscopic Sleeve Gastrectomy and Laparoscopic Roux-en-Y Gastric Bypass at Baseline, 6 months, and 1, 3, and 5 Years

|                                                                    | <b>Model based means<br/>(95% CI) in operations</b> | <b>Base<br/>line</b> | <b>0.5 y</b>           | <b>1y</b>              | <b>3y</b>              | <b>5y</b>              | <b>P-values of effects in<br/>ANOVA</b>       |
|--------------------------------------------------------------------|-----------------------------------------------------|----------------------|------------------------|------------------------|------------------------|------------------------|-----------------------------------------------|
|                                                                    |                                                     |                      |                        |                        |                        |                        |                                               |
| <u>TWL (%), model based<br/>mean (95% CI)<sup>o†</sup></u>         |                                                     |                      |                        |                        |                        |                        |                                               |
|                                                                    |                                                     |                      |                        |                        |                        |                        | Interaction of operation<br>and time: p=0.293 |
|                                                                    | LSG: 24.9 (23.6 to 26.2)                            |                      | n=119                  | n=111                  | n=108                  | n=98                   | Main effect of operation:<br>p=0.0012         |
|                                                                    | LRYGB: 28.1 (26.6 to<br>29.3)                       |                      | n=111                  | n=108                  | n=100                  | n=95                   |                                               |
| Model based means (95%<br>CI) in time-points                       |                                                     |                      | 25.4 (24.3<br>to 26.5) | 28.6 (27.5<br>to 29.7) | 27.2 (26.1<br>to 28.4) | 24.5 (23.3<br>to 25.6) | Main effect of time:<br>p<0.001               |
|                                                                    |                                                     |                      |                        |                        |                        |                        |                                               |
|                                                                    |                                                     |                      |                        |                        |                        |                        |                                               |
| <u>Weight (kg), model based<br/>mean (95% CI)<sup>o†</sup> [n]</u> |                                                     |                      |                        |                        |                        |                        |                                               |
|                                                                    |                                                     |                      |                        |                        |                        |                        | Interaction of operation<br>and time: p<0.001 |

|                                                                                                 |  |                              |                             |                            |                            |                             |  |
|-------------------------------------------------------------------------------------------------|--|------------------------------|-----------------------------|----------------------------|----------------------------|-----------------------------|--|
|                                                                                                 |  |                              |                             |                            |                            |                             |  |
| LSG                                                                                             |  | 135.3 (131.6 to 139.0) [121] | 102.4 (98.7 to 106.1) [119] | 98.4 (94.7 to 102.2)[111]  | 100.8 (97.1 to 104.6)[108] | 104.3 (100.5 to 108.1) [98] |  |
| LRYGB                                                                                           |  | 141.0 (137.3 to 144.7) [119] | 102.8 (99.0 to 106.5) [111] | 97.8 (94.0 to 101.6) [108] | 98.9 (95.1 to 102.7) [100] | 103.1 (99.3 to 107.0) [95]  |  |
| Difference                                                                                      |  |                              | -0.4 (-5.6 to 4.9)          | 0.6 (-4.6 to 6.0)          | 1.9 (-3.4 to 7.2)          | 1.2 (-4.2 to 6.6)           |  |
| P-value (corrected with step-down Bonferroni)                                                   |  |                              | 1.0                         | 1.0                        | 1.0                        | 1.0                         |  |
|                                                                                                 |  |                              |                             |                            |                            |                             |  |
| TWL (%) = total weight loss (%) = (initial weight – follow-up weight) : (initial weight) x 100% |  |                              |                             |                            |                            |                             |  |
| LSG = laparoscopic sleeve gastrectomy, LRYGB = laparoscopic Roux-en-Y gastric bypass            |  |                              |                             |                            |                            |                             |  |
| ° Superiority design was used in the analysis                                                   |  |                              |                             |                            |                            |                             |  |
| † Repeated measurements ANOVA                                                                   |  |                              |                             |                            |                            |                             |  |
| All the results are adjusted for center and diabetes status.                                    |  |                              |                             |                            |                            |                             |  |
